# Supplementary material for: Neuronally differentiated macula densa cells regulate tissue remodeling and regeneration in the kidney
Source: PubMed Central journal article supplement (PMC11142747; doi:10.1172/jci174558), 2024-04-10

# Full unedited gels for Supplemental Figure 4C

COX2

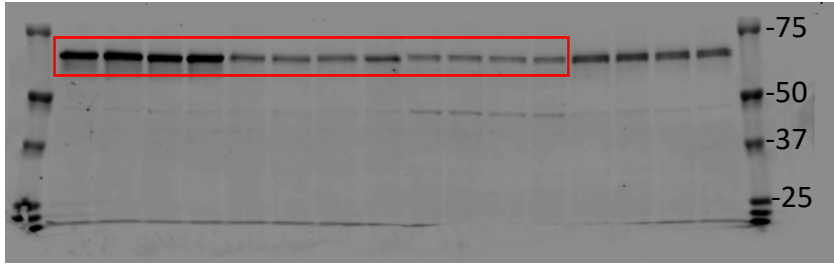

NKCC2

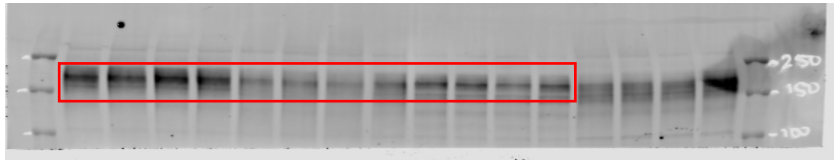

ROMK

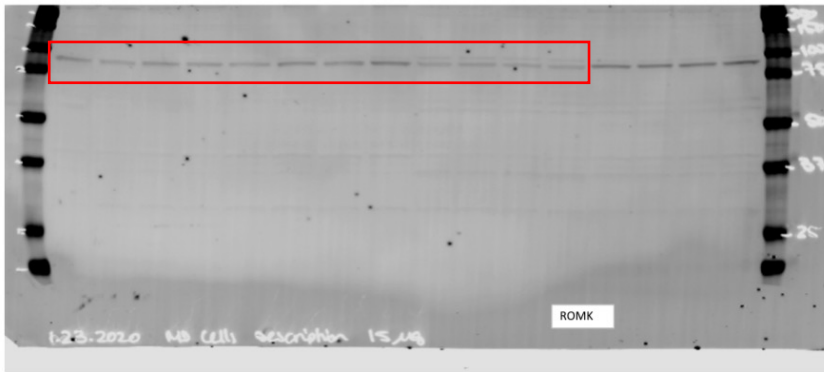

Total ERK 1/2

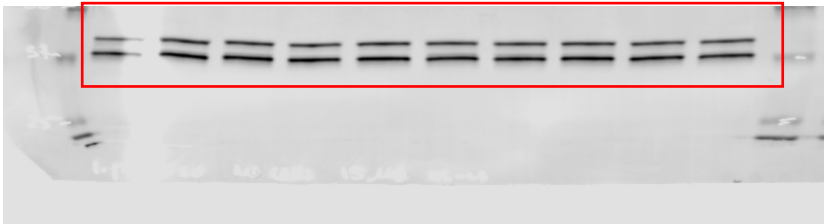

Phospho ERK 1/2

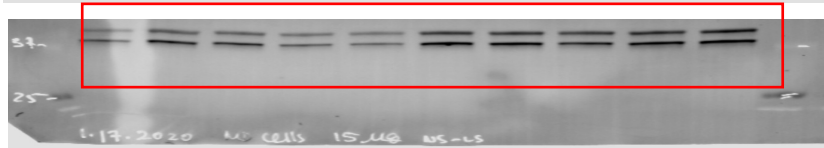

COX2

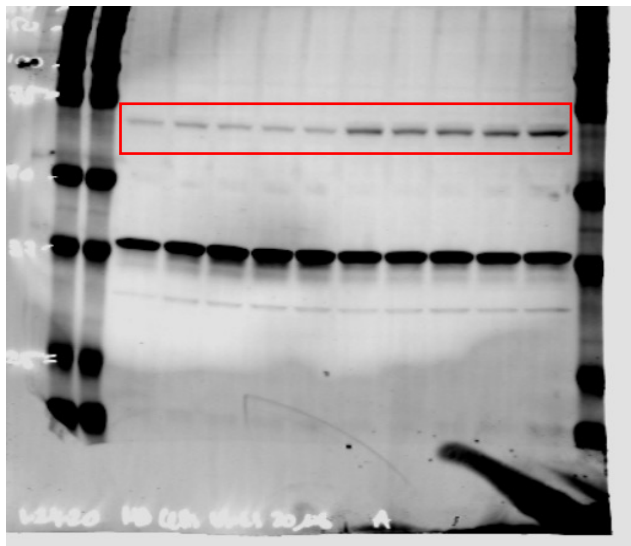

Phospho  
p38

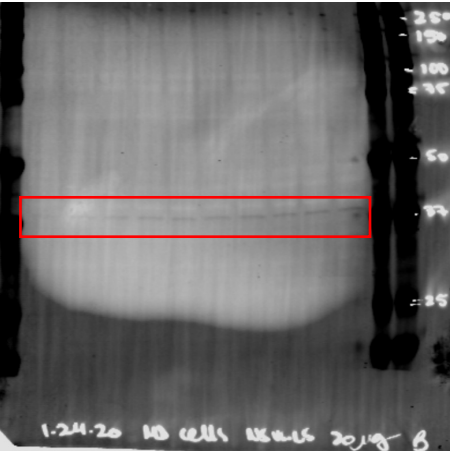

Total  
p38

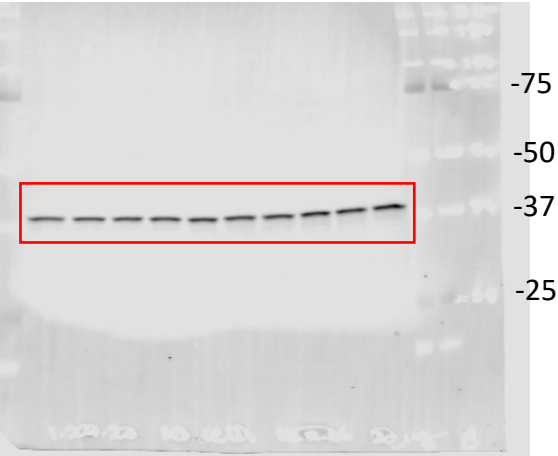

Full unedited gels for Figure 5D

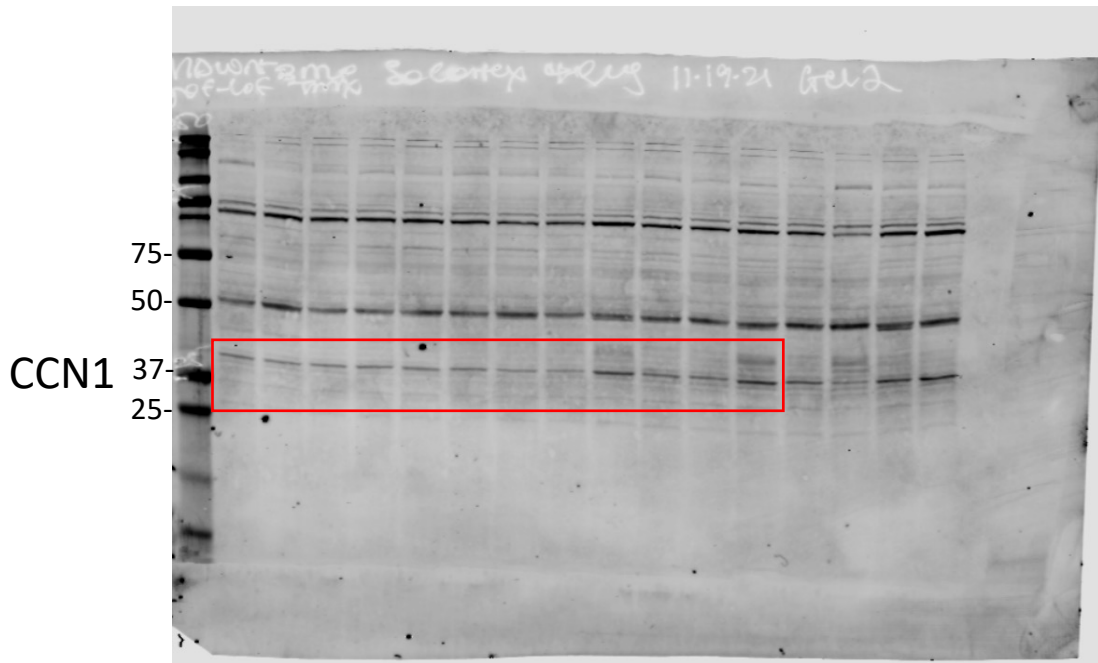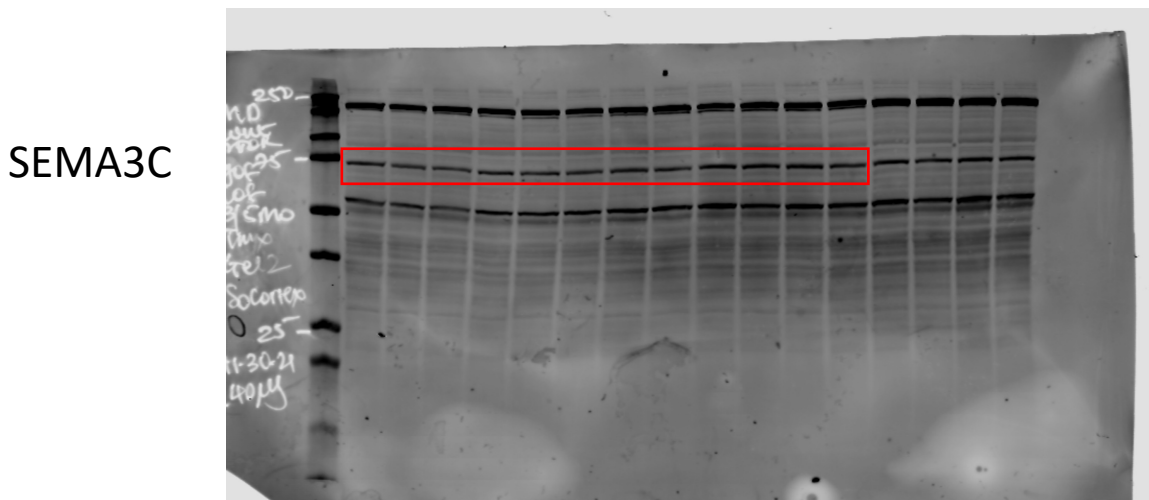

Full unedited gels for Figure 6F

CCN1

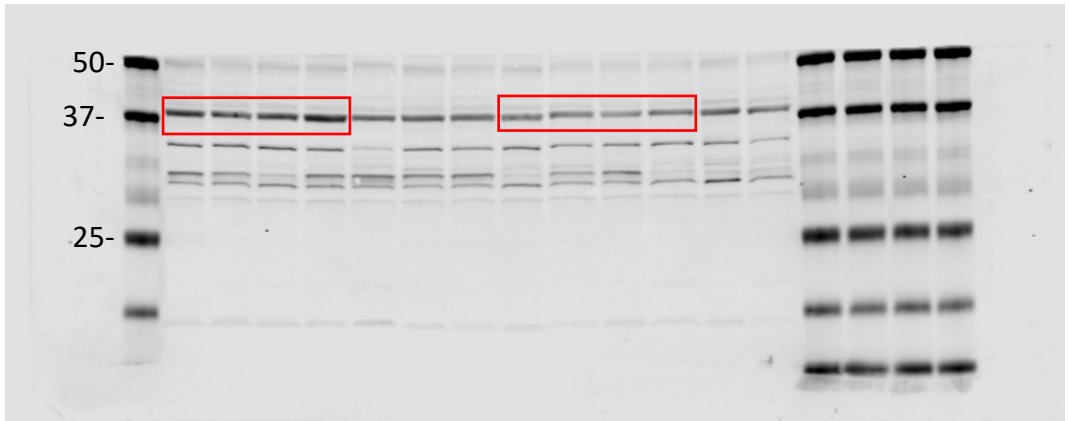

CCN3

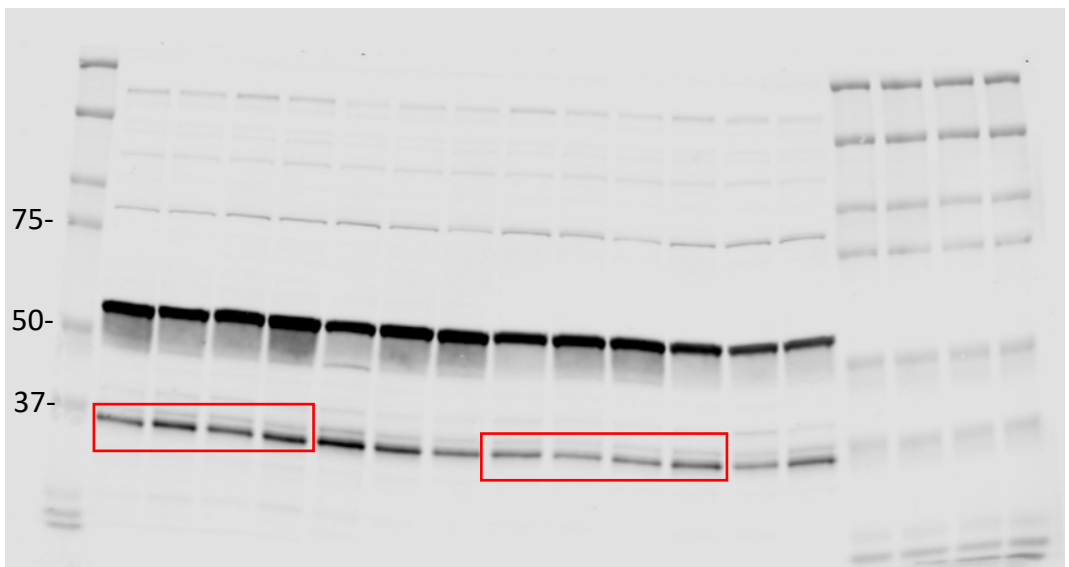

CXCL14

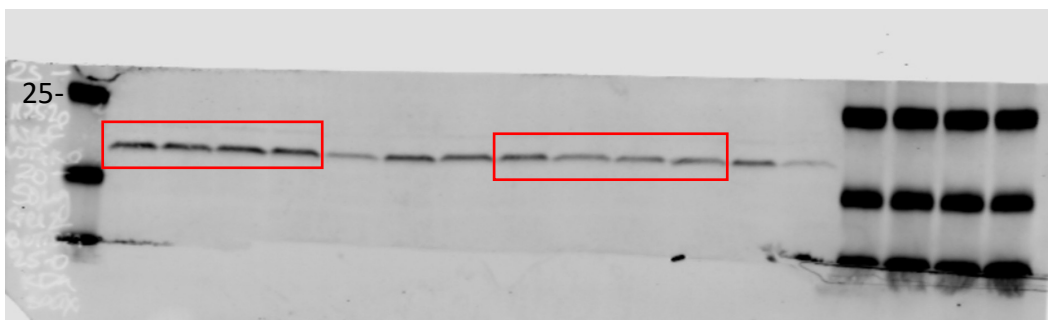

Full unedited gels for Supplemental Figure 6C

NGFR

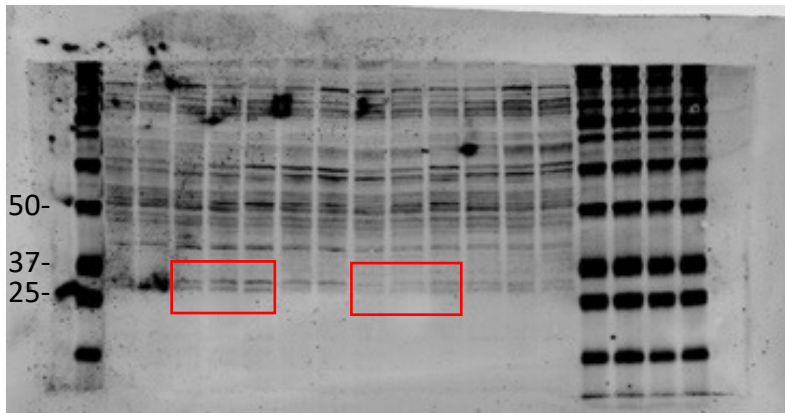

NGFR

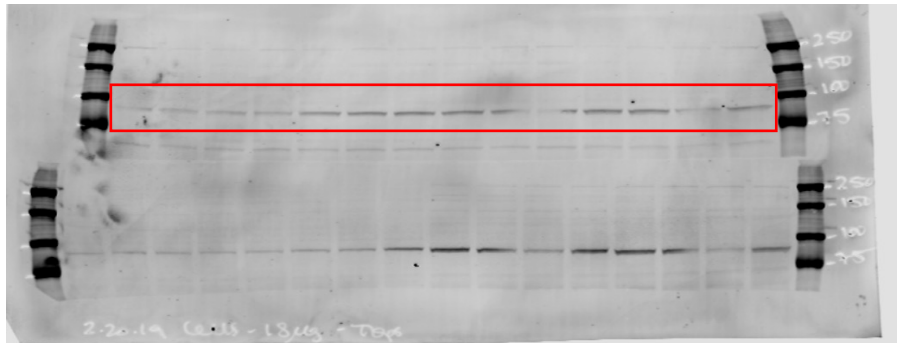

COX2

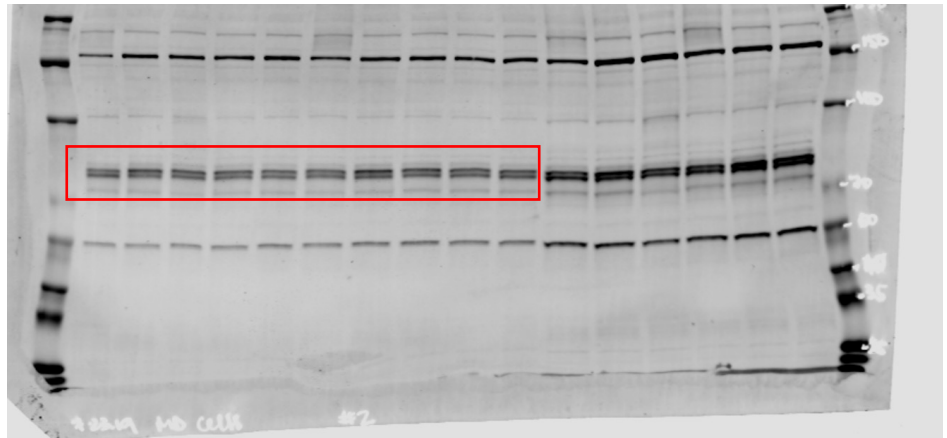

NKCC2

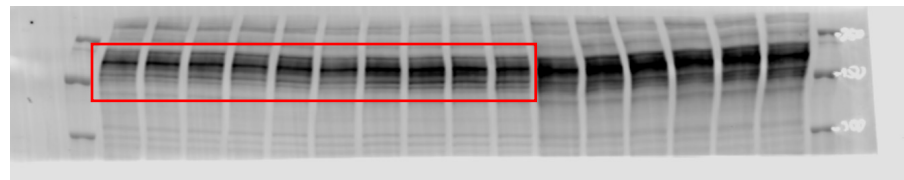

NOS1

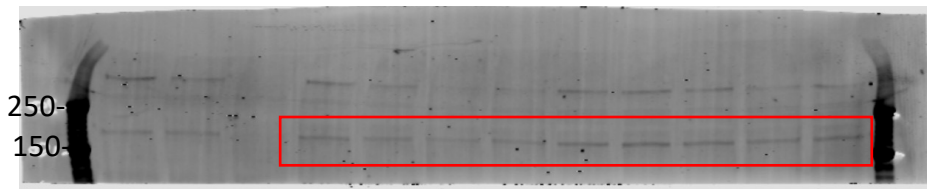

# Full unedited gels for Supplemental Figure 6D

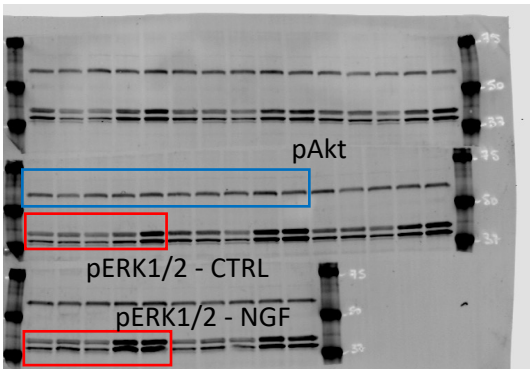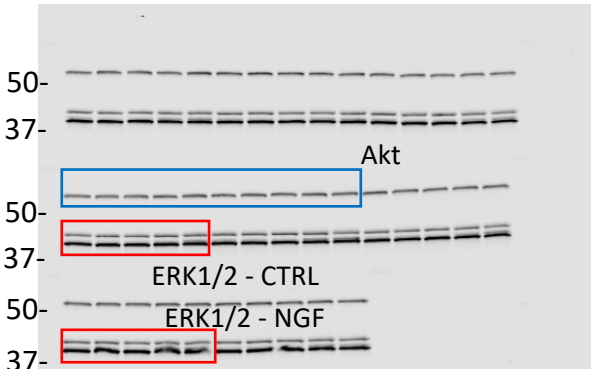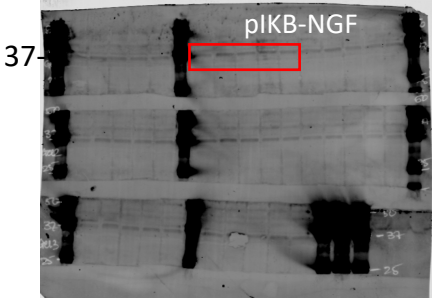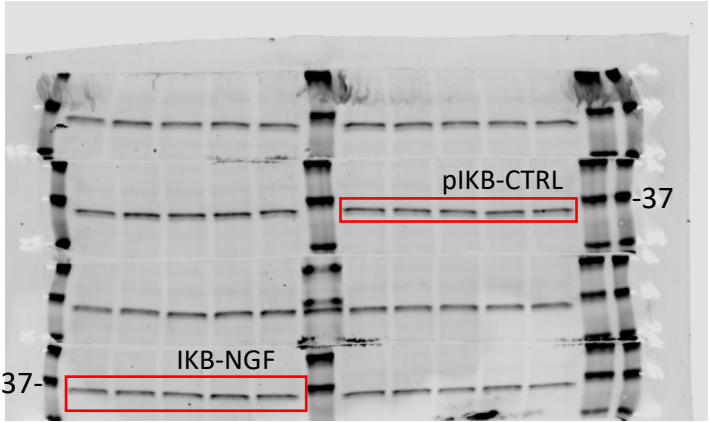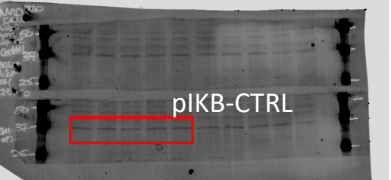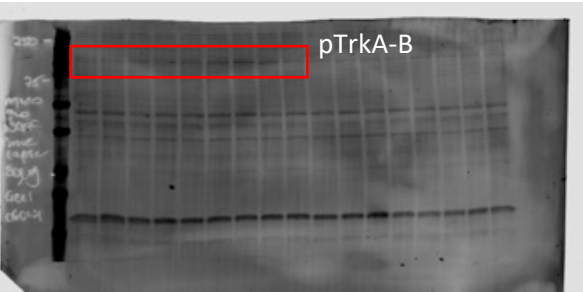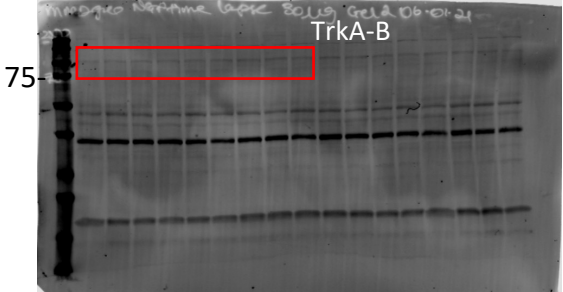

Supplement: jci-134-174558-s185.pdf [file jci-134-174558-s185.pdf]
